# Supplementary material for: Instruments for Measuring Violence on Acute Inpatient Psychiatric Units: Review and Recommendations
Source: Atypon-hosted journal article supplement (doi:10.1176/appi.ps.202000297), 2021-09-15
Supplement: appi.ps.202000297.ds001.pdf [file appi.ps.202000297.ds001.pdf]

| <b>SUPPLEMENT: SUMMARY OF INCLUDED STUDIES</b>                  |                                                                                                                            |
|-----------------------------------------------------------------|----------------------------------------------------------------------------------------------------------------------------|
| <b>Measure</b>                                                  | <b>Studies</b>                                                                                                             |
| <b>Progress/nursing notes questionnaires occurrence reports</b> | (21) ; (22); (20); (23); (24); (25); (26); (27) ; (28); (2); (3); (1); (29); (30); (31); (32); (33); (34);(35); (36);(37); |
| <b>Overt Aggression Scale (OAS)</b>                             | (38); (39); (40); (20); (41); (42); (43); (44); (45); (46); (47);                                                          |
| <b>Retrospective Overt Aggression Scale (ROAS)</b>              | (48)                                                                                                                       |
| <b>Modified Overt Aggression Scale (MOAS)</b>                   | (49); (50); (51); (5); (6); (4); (52);(7);(8);(9);(10);(11);(12);(13);(53); (54) ; (55); (56); (57); (58); (59)            |
| <b>Staff Observation Aggression Scale-Revised (SOAS/SOAS-R)</b> | (60); (61); (62); (63); (64); (65); (66); (34); (67); (68); (69); (70)                                                     |
| <b>Violence Scale (VS)</b>                                      | (71); (72)                                                                                                                 |
| <b>Report Form for Aggressive Behavior (REFA)</b>               | (73)                                                                                                                       |
| <b>Patient-Staff Conflict Checklist (PCC)</b>                   | (14); (74); (15); (16); (17);(18); (75); (19);(76); (77)                                                                   |
| <b>Social Dysfunction and Aggression Scale (SDAS)</b>           | (78); (79)                                                                                                                 |
| <b>Aggression Scale (AS)</b>                                    | (80)                                                                                                                       |
| <b>Crisis Intervention Questionnaire</b>                        | (81)                                                                                                                       |
| <b>Aggression Questionnaire</b>                                 | (82)                                                                                                                       |
| <b>Aggression Observation Short Form</b>                        | (83); (84)                                                                                                                 |
| <b>Perception of Aggression Scale</b>                           | (62)                                                                                                                       |
| <b>Positive and Negative Syndrome Scale-EC</b>                  | (85)                                                                                                                       |
| <b>Violent Incident Form</b>                                    | (86) ;(20)                                                                                                                 |

SUPPLEMENT: We removed duplicates as follows: we counted (1-3) as 1; (4-6) as 1; (7-13) as 1; and (14-19) as 1. We counted (20) as 3.

1. Knutzen M, Mjosund NH, Eidhammer G, et al.: Characteristics of psychiatric inpatients who experienced restraint and those who did not: a case-control study. *Psychiatric services (Washington, DC)* 62:492-7, 2011
2. Knutzen M, Bjorkly S, Eidhammer G, et al.: Mechanical and pharmacological restraints in acute psychiatric wards--why and how are they used? *Psychiatry research* 209:91-7, 2013
3. Knutzen M, Bjorkly S, Eidhammer G, et al.: Characteristics of patients frequently subjected to pharmacological and mechanical restraint--a register study in three Norwegian acute psychiatric wards. *Psychiatry research* 215:127-33, 2014
4. Kim YR, Lee JY, Min SK: No evidence of an association between A218C polymorphism of the tryptophan hydroxylase 1 gene and aggression in schizophrenia in a Korean population. *Yonsei medical journal* 51:27-32, 2010
5. Kim YR, Jahng JW, Min SK: Association between the serotonin transporter gene (5-HTTLPR) and anger-related traits in Korean schizophrenic patients. *Neuropsychobiology* 59:165-71, 2009
6. Kim YR, Kim JH, Kim SJ, et al.: Catechol-O-methyltransferase Val158Met polymorphism in relation to aggressive schizophrenia in a Korean population. *European neuropsychopharmacology : the journal of the European College of Neuropsychopharmacology* 18:820-5, 2008
7. Krakowski MI, Czobor P, Nolan KA: Atypical antipsychotics, neurocognitive deficits, and aggression in schizophrenic patients. *Journal of clinical psychopharmacology* 28:485-93, 2008
8. Krakowski M, Czobor P, Citrome L: Weight gain, metabolic parameters, and the impact of race in aggressive inpatients randomized to double-blind clozapine, olanzapine or haloperidol. *Schizophr Res* 110:95-102, 2009
9. Krakowski MI, Czobor P: A prospective longitudinal study of cholesterol and aggression in patients randomized to clozapine, olanzapine, and haloperidol. *Journal of clinical psychopharmacology* 30:198-200, 2010
10. Krakowski M, Czobor P: Cholesterol and cognition in schizophrenia: a double-blind study of patients randomized to clozapine, olanzapine and haloperidol. *Schizophr Res* 130:27-33, 2011
11. Krakowski MI, Czobor P: The denial of aggression in violent patients with schizophrenia. *Schizophr Res* 141:228-33, 2012
12. Krakowski MI, Czobor P: Executive function predicts response to antiaggression treatment in schizophrenia: a randomized controlled trial. *The Journal of clinical psychiatry* 73:74-80, 2012
13. Krakowski MI, Czobor P: Depression and impulsivity as pathways to violence: implications for antiaggressive treatment. *Schizophrenia bulletin* 40:886-94, 2014
14. Baker JA, Bowers L, Owiti JA: Wards features associated with high rates of medication refusal by patients: a large multi-centred survey. *Gen Hosp Psychiatry* 31:80-9, 2009
15. Bowers L, Whittington R, Nolan P, et al.: Relationship between service ecology, special observation and self-harm during acute in-patient care: City-128 study. *Br J Psychiatry* 193:395-401, 2008
16. Bowers L: Association between staff factors and levels of conflict and containment on acute psychiatric wards in England. *Psychiatric services (Washington, DC)* 60:231-9, 2009

17. Bowers L, Stewart D, Papadopoulos C, et al.: Correlation between levels of conflict and containment on acute psychiatric wards: the city-128 study. *Psychiatric services (Washington, DC)* 64:423-30, 2013
18. Stewart D, Bowers L: Inpatient verbal aggression: Content, targets and patient characteristics. *Journal of psychiatric and mental health nursing* 20:236-43, 2013
19. Papadopoulos C, Bowers L, Quirk A, et al.: Events preceding changes in conflict and containment rates on acute psychiatric wards. *Psychiatric services (Washington, DC)* 63:40-7, 2012
20. Carr VJ, Lewin TJ, Sly KA, et al.: Adverse incidents in acute psychiatric inpatient units: Rates, correlates and pressures. *Australian and New Zealand Journal of Psychiatry* 42:267-82, 2008
21. Biancosino B, Delmonte S, Grassi L, et al.: Violent behavior in acute psychiatric inpatient facilities: a national survey in Italy. *The Journal of nervous and mental disease* 197:772-82, 2009
22. Bowers L, Cullen AE, Achilla E, et al.: in Seclusion and Psychiatric Intensive Care Evaluation Study (SPICES): combined qualitative and quantitative approaches to the uses and outcomes of coercive practices in mental health services. Southampton (UK), 2017
23. Chen WC, Huang CJ, Chen CC, et al.: The incidence and risk factors of workplace violence towards female nurses reported via internet in an acute psychiatric hospital. *Archives of environmental & occupational health* 66:100-6, 2011
24. Clarke DE, Brown AM, Griffith P: The Broset Violence Checklist: clinical utility in a secure psychiatric intensive care setting. *Journal of psychiatric and mental health nursing* 17:614-20, 2010
25. Dickens GL, O'Shea LE: How short should short-term risk assessment be? Determining the optimum interval for START reassessment in a secure mental health service. *Journal of psychiatric and mental health nursing* 22:397-406, 2015
26. Dumais A, Larue C, Michaud C, et al.: Predictive validity and psychiatric nursing staff's perception of the clinical usefulness of the French version of the Dynamic Appraisal of Situational Aggression. *Issues in mental health nursing* 33:670-5, 2012
27. Gardner LA, Magee, M.C.: Patient-to-Patient Aggression in the Inpatient Behavioral Health Setting; in Pennsylvania Patient Safety Advisory, 2014
28. Hotham JE, Simpson PJ, Brooman-White RS, et al.: Augmentation of clozapine with amisulpride: an effective therapeutic strategy for violent treatment-resistant schizophrenia patients in a UK high-security hospital. *CNS spectrums* 19:403-10, 2014
29. Newton VM, Elbogen EB, Brown CL, et al.: Clinical decision-making about inpatient violence risk at admission to a public-sector acute psychiatric hospital. *The journal of the American Academy of Psychiatry and the Law* 40:206-14, 2012
30. O'Shea LE, Picchioni MM, Dickens GL: The Predictive Validity of the Short-Term Assessment of Risk and Treatability (START) for Multiple Adverse Outcomes in a Secure Psychiatric Inpatient Setting. *Assessment* 23:150-62, 2016
31. Pekurinen VM, Valimaki M, Virtanen M, et al.: Organizational Justice and Collaboration Among Nurses as Correlates of Violent Assaults by Patients in Psychiatric Care. *Psychiatric services (Washington, DC)* 68:490-6, 2017
32. Roaldset JO, Hartvig P, Morten Linaker O, et al.: A multifaceted model for risk assessment of violent behaviour in acutely admitted psychiatric patients. *Psychiatry research* 200:773-8, 2012
33. Sanghani SN, Marsh AN, John M, et al.: Characteristics of Patients Involved in Physical Assault in an Acute Inpatient Psychiatric Setting. *Journal of psychiatric practice* 23:260-9, 2017
34. Sato K, Wakabayashi T, Kiyoshi-Teo H, et al.: Factors associated with nurses' reporting of patients' aggressive behavior: A cross-sectional survey. *International journal of nursing studies* 50:1368-76, 2013

35. Schneeberger AR, Kowalinski E, Frohlich D, et al.: Aggression and violence in psychiatric hospitals with and without open door policies: A 15-year naturalistic observational study. *Journal of psychiatric research* 95:189-95, 2017
36. Virtanen M, Vahtera J, Batty GD, et al.: Overcrowding in psychiatric wards and physical assaults on staff: data-linked longitudinal study. *Br J Psychiatry* 198:149-55, 2011
37. Yao X, Li Z, Arthur D, et al.: Acceptability and psychometric properties of Broset Violence Checklist in psychiatric care settings in China. *Journal of psychiatric and mental health nursing* 21:848-55, 2014
38. Allen MH, Debanne M, Lazignac C, et al.: Effect of nicotine replacement therapy on agitation in smokers with schizophrenia: a double-blind, randomized, placebo-controlled study. *The American journal of psychiatry* 168:395-9, 2011
39. Amore M, Menchetti M, Tonti C, et al.: Predictors of violent behavior among acute psychiatric patients: clinical study. *Psychiatry and clinical neurosciences* 62:247-55, 2008
40. Berman BA, Duffy K, Serper MR: Beliefs about voices and aggressive behavior in inpatients in an acute psychiatric setting. *The Journal of clinical psychiatry* 71:497-501, 2010
41. Cho UJ, Lee J, Kim HW, et al.: Age structure at diagnosis affects aggression in a psychiatric inpatient population: age structure affecting inpatient aggression. *Psychiatry research* 220:1059-63, 2014
42. Cookson A, Daffern M, Foley F: Relationship between aggression, interpersonal style, and therapeutic alliance during short-term psychiatric hospitalization. *International journal of mental health nursing* 21:20-9, 2012
43. Nolan KA, Shope CB, Citrome L, et al.: Staff and patient views of the reasons for aggressive incidents: a prospective, incident-based study. *The Psychiatric quarterly* 80:167-72, 2009
44. O'Shea LE, Dickens GL: The HCR-20 as a measure of reliable and clinically significant change in violence risk among secure psychiatric inpatients. *Comprehensive psychiatry* 62:132-40, 2015
45. Park JS, Lee K: Modification of severe violent and aggressive behavior among psychiatric inpatients through the use of a short-term token economy. *Journal of Korean Academy of Nursing* 42:1062-9, 2012
46. Podubinski T, Lee S, Hollander Y, et al.: Patient characteristics associated with aggression in mental health units. *Psychiatry research* 250:141-5, 2017
47. Sada A, Robles-Garcia R, Martinez-Lopez N, et al.: Assessing the reliability, predictive and construct validity of historical, clinical and risk management-20 (HCR-20) in Mexican psychiatric inpatients. *Nordic journal of psychiatry* 70:456-61, 2016
48. Serper M, Beech DR, Harvey PD, et al.: Neuropsychological and symptom predictors of aggression on the psychiatric inpatient service. *Journal of clinical and experimental neuropsychology* 30:700-9, 2008
49. Amon JS, Johnson SB, El-Mallakh RS: Aripiprazole for the Control of Physical Aggression: A Prospective Naturalist Pilot Study. *Psychopharmacology bulletin* 47:27-32, 2017
50. Chukwujekwu DC, Stanley PC: Prevalence and correlates of aggression among psychiatric in-patients at Jos University Teaching Hospital. *Niger J Clin Pract* 14:163-7, 2011
51. Jones NT, McGill AC, Vogler JE, et al.: Functional Deficits and Aggressive Behaviors in an Inpatient Psychiatric Hospital: Description and Clinical Implications. *The Journal of nervous and mental disease* 205:31-6, 2017
52. Knezevic V, Mitrovic D, Drezgic-Vukic S, et al.: Prevalence and Correlates of Aggression and Hostility in Hospitalized Schizophrenic Patients. *Journal of interpersonal violence* 32:151-63, 2017

53. Lanza ML, Rierdan J, Forester L, et al.: Reducing violence against nurses: the violence prevention community meeting. *Issues in mental health nursing* 30:745-50, 2009
54. Mauri MC, Rovera, C., Paletta, S., De Gaspari, I.F., Maffini, M., and Altamura, A.C.: Aggression and psychopharmacological treatments in major psychosis and personality disorders during hospitalisation. *Progress in Neuro-Psychopharmacology and Biological Psychiatry* 35:1631-5, 2011
55. Mi W, Zhang S, Liu Q, et al.: Prevalence and risk factors of agitation in newly hospitalized schizophrenia patients in China: An observational survey. *Psychiatry research* 253:401-6, 2017
56. Nawka A, Kalisova L, Raboch J, et al.: Gender differences in coerced patients with schizophrenia. *BMC psychiatry* 13:257, 2013
57. Ridenour M, Lanza M, Hendricks S, et al.: Incidence and risk factors of workplace violence on psychiatric staff. *Work (Reading, Mass)* 51:19-28, 2015
58. Zhou JS, Xiang YT, Zhu XM, et al.: Voluntary and Involuntary Psychiatric Admissions in China. *Psychiatric services (Washington, DC)* 66:1341-6, 2015
59. Zhu X, Li W, Wang X: Characteristics of Aggressive Behavior among Male Inpatients with Schizophrenia. *Shanghai archives of psychiatry* 28:280-8, 2016
60. Cohen DPA, M.S., Siddiqui, A., Shelley, C., Larkin, C., Kinsella, A., O'Callaghan, E. and Lane, A. : Aggressive incidents on a psychiatric intensive care unit. *Psychiatric Bulletin* 32:455-8, 2008
61. Danivas V, Lepping P, Punitharani S, et al.: Observational study of aggressive behaviour and coercion on an Indian acute ward. *Asian journal of psychiatry* 22:150-6, 2016
62. De Benedictis L, Dumais A, Sieu N, et al.: Staff perceptions and organizational factors as predictors of seclusion and restraint on psychiatric wards. *Psychiatric services (Washington, DC)* 62:484-91, 2011
63. Grube M, Liszka R, Weigand-Tomiuk H: Creatine kinase associated with aggressive behavior in psychiatric patients. *Gen Hosp Psychiatry* 30:564-71, 2008
64. Iennaco JD, Whittemore R, Dixon J: Aggressive Event Incidence using the Staff Observation of Aggression Scale-Revised (SOAS-R): A Longitudinal Study. *The Psychiatric quarterly* 88:485-99, 2017
65. Noda T, Nijman H, Sugiyama N, et al.: Factors affecting assessment of severity of aggressive incidents: using the Staff Observation Aggression Scale - Revised (SOAS-R) in Japan. *Journal of psychiatric and mental health nursing* 19:770-5, 2012
66. Rechenmacher J, Muller G, Abderhalden C, et al.: The diagnostic efficiency of the extended German Broset Violence Checklist to assess the risk of violence. *Journal of nursing measurement* 22:201-12, 2014
67. Sato M, Noda T, Sugiyama N, et al.: Characteristics of aggression among psychiatric inpatients by ward type in Japan: Using the Staff Observation Aggression Scale - Revised (SOAS-R). *International journal of mental health nursing* 26:602-11, 2017
68. Vaaler AE, Iversen VC, Morken G, et al.: Short-term prediction of threatening and violent behaviour in an Acute Psychiatric Intensive Care Unit based on patient and environment characteristics. *BMC psychiatry* 11:44, 2011
69. van de Sande R, Nijman HL, Noorthoorn EO, et al.: Aggression and seclusion on acute psychiatric wards: effect of short-term risk assessment. *Br J Psychiatry* 199:473-8, 2011
70. Yao X, Li Z, Arthur D, et al.: The application of a violence risk assessment tool among Chinese psychiatric service users: a preliminary study. *Journal of psychiatric and mental health nursing* 19:438-45, 2012

71. Chen SC, Hwu HG, Hu FC: Clinical prediction of violence among inpatients with schizophrenia using the Chinese modified version of Violence Scale: a prospective cohort study. *International journal of nursing studies* 51:198-207, 2014
72. Ivgi D, Bauer A, Khawaled R, et al.: Validation of the HCR-20 Scale for Assessing Risk of Violent Behavior in Israeli Psychiatric Inpatients. *The Israel journal of psychiatry and related sciences* 52:121-7, 2015
73. Hartvig P, Roaldset JO, Moger TA, et al.: The first step in the validation of a new screen for violence risk in acute psychiatry: The inpatient context. *European psychiatry : the journal of the Association of European Psychiatrists* 26:92-9, 2011
74. Bowers L, Flood C, Bbrennan G, et al.: A replication study of the City nurse intervention: Reducing conflict and containment on three acute psychiatric wards. *Journal of psychiatric and mental health nursing* 15:737-42, 2008
75. Bowers L, James K, Quirk A, et al.: Reducing conflict and containment rates on acute psychiatric wards: The Safewards cluster randomised controlled trial. *International journal of nursing studies* 52:1412-22, 2015
76. Ross J, Bowers L, Stewart D: Conflict and containment events in inpatient psychiatric units. *Journal of clinical nursing* 21:2306-15, 2012
77. Stewart D, Ross J, Watson C, et al.: Patient characteristics and behaviours associated with self-harm and attempted suicide in acute psychiatric wards. *Journal of clinical nursing* 21:1004-13, 2012
78. van Dongen JD, Buck NM, van Marle HJ: Delusional distress partly explains the relation between persecutory ideations and inpatient aggression on the ward. *Psychiatry research* 200:779-83, 2012
79. Van de Sande R NE, Nijman H, Wierdsma A, van de Staak C, Hellendorn E, and Mulder N Associations between psychiatric symptoms and seclusion use: Clinical implications for care planning. *Int J Mental Health Nurs* 26:423-36, 2017
80. Kapsali F, Rabavilas AD, Michopoulou A, et al.: Aggressive behaviour in schizophrenic patients after abrupt treatment discontinuation. *International journal of psychiatry in clinical practice* 15:296-302, 2011
81. Amoo G, Fatoye FO: Aggressive behaviour and mental illness: a study of in-patients at Aro Neuropsychiatric Hospital, Abeokuta. *Niger J Clin Pract* 13:351-5, 2010
82. Claes L, Vertommen S, Soenens B, et al.: Validation of the Psychopathic Personality Inventory among psychiatric inpatients: sociodemographic, cognitive and personality correlates. *J Pers Disord* 23:477-93, 2009
83. Hvidhjelm J, Sestoft D, Bjorner JB: The Aggression Observation Short Form identified episodes not reported on the Staff Observation Aggression Scale--Revised. *Issues in mental health nursing* 35:464-9, 2014
84. Hvidhjelm J, Sestoft D, Skovgaard LT, et al.: Aggression in Psychiatric Wards: Effect of the Use of a Structured Risk Assessment. *Issues in mental health nursing* 37:960-7, 2016
85. Johnson JM, Wu CY, Winder GS, et al.: The Effects of Cannabis on Inpatient Agitation, Aggression, and Length of Stay. *Journal of dual diagnosis* 12:244-51, 2016
86. Magnavita N: Violence prevention in a small-scale psychiatric unit: program planning and evaluation. *Int J Occup Environ Health* 17:336-44, 2011

(((((((((("Violence"[Mesh:noexp] OR "Workplace Violence"[Mesh] OR aggression[mesh] OR violen\*[tiab] OR aggression[tiab] OR assault\*[tiab]) AND (psychological tests[mesh:noexp] OR psychometrics[mesh] OR questionnaires[mesh] OR checklist[mesh] OR "predictive value of tests"[mesh] OR "Psychiatric Status Rating Scales"[Mesh] OR psychometric\*[tiab] OR quantif\*[tiab] OR Questionnaire[tiab] OR Questionnaires[tiab] OR Scale[tiab] OR Scales[tiab] OR Score[tiab] OR Scores[tiab] OR checklist[tiab] OR checklists[tiab])) OR ("Gunn Robertson Scale"[tiab] OR "gunn robertson scales"[tiab] OR "Liverpool Violence Assessment"[tiab] OR "aggressive-acts questionnaire"[tiab] OR "aggressive/assaultive incident report form"[tiab] OR "aggressive incident report form"[tiab] OR "assaultive incident report form"[tiab] OR "attitude to containment measures questionnaire"[tiab] OR "brown-goodwin lifetime history of aggression"[tiab] OR "aggression inventory"[tiab] OR "conflict tactics scale"[tiab] OR "conflict checklist"[tiab] OR "dynamic appraisal of situational aggression"[tiab] OR "progressive aggression"[tiab] OR "verbal aggression measure"[tiab] OR "violence risk"[tiab] OR "violence proneness"[tiab] OR "violence prevention screening protocol"[tiab] OR "violence attitude scale"[tiab] OR "violence scale"[tiab] OR "Violence Checklist"[tiab] OR "violence rating scale"[tiab] OR "Suicidal Risk Scale"[tiab] OR "Suicide Risk Scale"[tiab] OR "overt aggression and agitation scale"[tiab] OR "scale for aggressive and agitated behaviors-modified"[tiab] OR "scale for aggressive and agitated behaviors"[tiab] OR "scale for suicidal ideation"[tiab] OR "Suicidal Ideation Screening Questionnaire"[tiab] OR "observation scale for aggressive behavior"[tiab] OR "impact of patient aggression on carers scale"[tiab] OR "aggression checklist"[tiab] OR "aggression instrument"[tiab] OR "aggression inventory"[tiab] OR "aggression task"[tiab] OR "aggression paradigm"[tiab] OR "aggression survey"[tiab] OR "aggression scale"[tiab] OR "aggression scale-modified"[tiab] OR "aggression scale-revised"[tiab] OR "scale for aggressive behavior"[tiab] OR "physical assault questionnaire"[tiab] OR "Assault Scale"[tiab] OR "assault interview checklist"[tiab] OR "assault rating scale"[tiab] OR "assault response questionnaire"[tiab] OR "Aggression Questionnaire"[tiab] OR "Aggressive behavior scale"[tiab] OR "MacArthur Community Violence Instrument"[tiab])) AND ("Hospitals, Psychiatric"[Mesh] OR "Psychiatric Department, Hospital"[Mesh] OR "psychiatric inpatients"[tiab] OR "psychiatric inpatient"[tiab] OR "psychiatric units"[tiab] OR "psychiatric unit"[tiab] OR "psychiatric ward"[tiab] OR "psychiatric wards"[tiab] OR "psychiatric hospital"[tiab] OR "psychiatric hospitals"[tiab] OR "psychiatry inpatient unit"[tiab] OR "psychiatry inpatient units"[tiab])) AND Humans[Mesh] AND English[lang] AND adult[MeSH:noexp])) NOT forensic) AND Humans[Mesh] AND English[lang] AND adult[MeSH:noexp])) NOT geriatric AND ("last 10 years"[PDat] AND Humans[Mesh] AND English[lang] AND adult[MeSH:noexp]))
